# Supplementary material for: Fabrication of heterostructured Pd-porphyrin MOFs/ZnIn2S4composites to boost photocatalytic hydrogen evolution under visible light irradiation
Source: Royal Society of Chemistry journal article supplement (doi:10.1039/d3qi00803g), 2023-01-01
Supplement: d3qi00803g1.pdf [file d3qi00803g1.pdf]

# Fabrication of heterostructured Pd-porphyrin MOFs/ $\text{ZnIn}_2\text{S}_4$ composites to boost photocatalytic hydrogen evolution under visible light irradiation

Sheng Wang<sup>a</sup>, Huiyi Feng<sup>a</sup>, Chenglong Zheng<sup>a</sup>, Shihao Li<sup>a</sup>, Shilu Fan<sup>a\*</sup>, Yi-Si Feng<sup>a,b,\*</sup>

<sup>a</sup>*School of Chemistry and Chemical Engineering, Hefei University of Technology, Hefei 230009, Anhui, China*

<sup>b</sup>*Anhui Province Key Laboratory of Advance Catalytic Materials and Reaction Engineering, Hefei 230009, P. R. China*

1. Fig. S1 high resolution XPS spectra (N 1s) of pure TCPP and Pd-PMOFs.

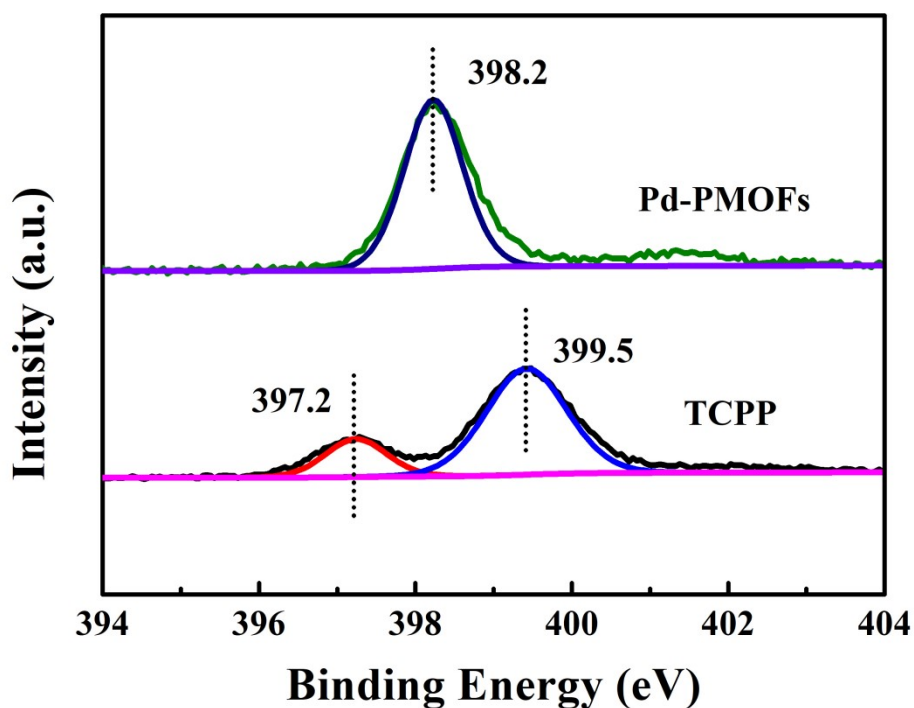

2. Description of Density Functional Theory (DFT) calculations

In Density Functional Theory calculation, we constructed  $\text{ZnIn}_2\text{S}_4(102)$  slab model. The Pd-PMOF molecule was built in a  $30 \times 30 \times 30 \text{ \AA}^3$  box. The Pd-PMOF was put on the surface of  $\text{ZnIn}_2\text{S}_4(102)$   $1 \times 3 \times 1$  supercell to form the heterostructure. Structural optimization were performed by Vienna *Ab-initio* Simulation Package(VASP) with the projector augmented wave (PAW) method [1, 2]. The exchange-functional was treated using the Perdew-Burke-Ernzerhof (PBE) functional [3]. DFT-D3 correction was introduced to describe the weak interactions between atoms [4]. The cut-off energy of the plane-wave basis was set at 450 eV in structural optimization. For the optimization of both geometry and lattice size, the Brillouin zone integration was performed with  $1 \times 1 \times 1$  Gamma<sup>4</sup> *k*-point sampling. The self-consistent calculations applied a convergence energy threshold of  $10^{-5}$  eV. The equilibrium geometries and lattice constants were optimized with maximum stress on each atom within  $0.02 \text{ eV \AA}^{-1}$ .

Fig. S2 The HOMO/LUMO orbitals of pure TCPP and Pd-PMOFs from DFT.

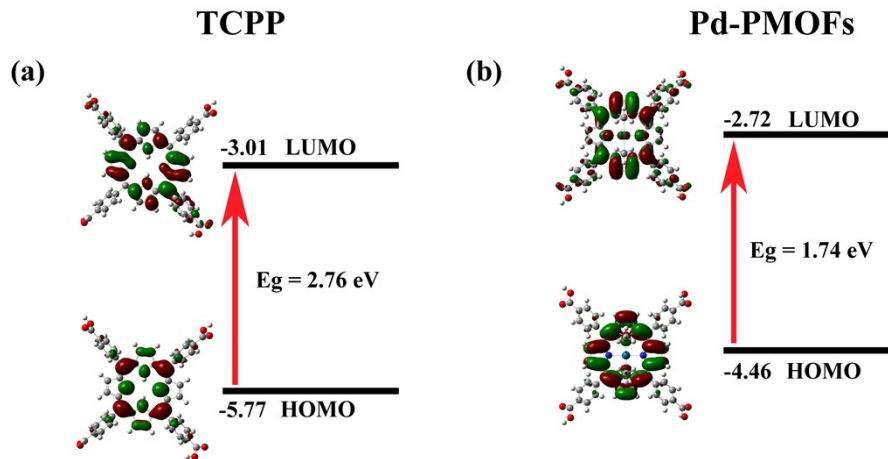

Fig. S3 The actual Pd content in Pd-PMOFs@ZIS-2 before and after experiments.

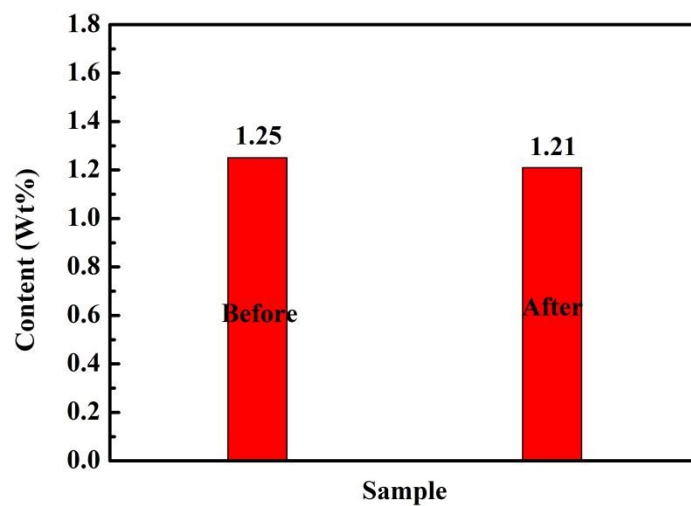

#### Reference

- [1] J. Hafner, Journal of Computational Chemistry. 2008, **29**, 2044-2078.
- [2] P. E. Blöchl, Physical Review B. 1994, **50**, 17953.
- [3] J. P. Perdew, K. Burke, M. Ernzerhof, Physical Review Letters. 1996, **77**, 3865.
- [4] S. Grimme, Journal of Computational Chemistry. 2006, **27**, 1787-1799.
